# Supplementary material for: Human Milk Oligosaccharide Profile Variation Throughout Postpartum in Healthy Women in a Brazilian Cohort
Source: PubMed Central journal article supplement (PMC7146368; doi:10.3390/nu12030790), 2020-03-17
Supplement: nutrients-12-00790-s001.pdf [file nutrients-12-00790-s001.pdf]

**Table S1.** Time variation of HMOs concentrations according to Secretor status of women followed on Brazilian cohort. Rio de Janeiro, Brazil (n=101).

| HMOs<br>(mmol/L) | Secretors women – median (IQR)<br>Days postpartum (n) |                                |                                | Non-Secretors women – median (IQR)<br>Days postpartum (n) |                  |                   |
|------------------|-------------------------------------------------------|--------------------------------|--------------------------------|-----------------------------------------------------------|------------------|-------------------|
|                  | 2-8 (n=46)                                            | 28-50 (n=68)                   | 88-119 (n=42)                  | 2-8 (n=6)                                                 | 28-50 (n=7)      | 88-119 (n=4)      |
|                  |                                                       |                                |                                |                                                           |                  |                   |
|                  | <b>Fucosylated or sialylated lactose</b>              |                                |                                |                                                           |                  |                   |
| 2'FL             | 5.42 (4.20-6.64)                                      | 5.18 (3.65-5.96)               | 4.38 (3.50-6.26)               | 0.01 (0.01-0.01)                                          | 0.03 (0.00-0.05) | 0.03 (0.00-0.06)  |
| 3FL              | 0.28 <sup>y</sup> (0.19-0.46)                         | 0.36 <sup>z</sup> (0.28-0.90)  | 2.24 <sup>yz</sup> (0.36-5.29) | 0.13 (0.06-0.14)                                          | 0.16 (0.13-0.27) | 1.02 (0.64-2.68)  |
| DFLac            | 0.27 <sup>y</sup> (0.21-0.35)                         | 0.39 <sup>z</sup> (0.31-0.52)  | 0.45 <sup>yz</sup> (0.39-0.60) | 0.07 (0.01-0.13)                                          | 0.05 (0.03-0.07) | 0.05 (0.01-0.10)  |
| 3'SL             | 0.32 <sup>y</sup> (0.25-0.48)                         | 0.39 <sup>z</sup> (0.29-0.62)  | 0.55 <sup>yz</sup> (0.44-0.70) | 0.20 (0.11-0.25)                                          | 0.33 (0.25-0.40) | 0.35 (0.17-0.50)  |
| 6'SL             | 0.39 <sup>xy</sup> (0.22-0.55)                        | 0.64 <sup>xz</sup> (0.49-0.93) | 0.51 <sup>yz</sup> (0.39-0.74) | 0.25 (0.23-0.55)                                          | 0.55 (0.43-0.89) | 0.41 (0.31-0.59)  |
|                  | <b>Non-fucosylated, non-sialylated HMOs</b>           |                                |                                |                                                           |                  |                   |
| LNT              | 1.32 (1.02-1.92)                                      | 1.39 (1.03-1.96)               | 1.40 (1.09-1.72)               | 2.91 (2.47-3.33)                                          | 1.89 (1.53-2.49) | 0.97 (0.81-1.07)  |
| LNnT             | 0.58 <sup>x</sup> (0.30-1.15)                         | 0.27 <sup>xz</sup> (0.17-0.41) | 0.36 <sup>z</sup> (0.17-0.61)  | 0.62 (0.51-1.15)                                          | 0.30 (0.19-0.43) | 0.26 (0.19-0.34)  |
| LNH              | 0.06 <sup>y</sup> (0.03-0.11)                         | 0.08 <sup>z</sup> (0.05-0.15)  | 0.06 <sup>yz</sup> (0.04-0.09) | 0.11 (0.08-0.13)                                          | 0.08 (0.08-0.11) | 0.07 (0.04-0.09)  |
|                  | <b>Fucosylated, non-sialylated HMOs</b>               |                                |                                |                                                           |                  |                   |
| LNFP I           | 2.85 <sup>x</sup> (2.27-3.49)                         | 1.72 <sup>xz</sup> (1.06-2.42) | 0.82 <sup>z</sup> (0.53-1.63)  | 0.10 (0.07-0.11)                                          | 0.12 (0.10-0.13) | 0.13 (0.10-0.14)  |
| LNFP II          | 0.75 <sup>y</sup> (0.59-1.02)                         | 1.08 <sup>z</sup> (0.81-1.40)  | 1.55 <sup>yz</sup> (1.39-2.05) | 2.17 (1.93-2.62)                                          | 2.52 (2.27-2.95) | 3.37 (2.98-3.71)  |
| LNFP III         | 0.08 <sup>x</sup> (0.07-0.12)                         | 0.07 <sup>xz</sup> (0.05-0.10) | 0.04 <sup>z</sup> (0.02-0.06)  | 0.08 (0.07-0.13)                                          | 0.08 (0.05-0.09) | 0.05 (0.03-0.08)  |
| DFLNT            | 1.54 <sup>y</sup> (1.00-1.85)                         | 1.55 <sup>z</sup> (0.98-1.87)  | 1.27 <sup>yz</sup> (1.00-1.63) | 0.30 (0.28-0.44)                                          | 0.39 (0.16-0.68) | 0.92 (0.65-1.11)  |
| FLNH             | 0.12 <sup>y</sup> (0.06-0.16)                         | 0.15 <sup>z</sup> (0.08-0.23)  | 0.10 <sup>yz</sup> (0.07-0.14) | 0.03 (0.02-0.08)                                          | 0.08 (0.04-0.13) | 0.08 (0.07-0.10)  |
| DFLNH            | 0.14 (0.06-0.22)                                      | 0.17 (0.10-0.26)               | 0.13 (0.05-0.21)               | 0.02 (0.01-0.03)                                          | 0.02 (0.01-0.03) | 0.02 (0.01-0.09)  |
|                  | <b>Non-fucosylated, sialylated HMOs</b>               |                                |                                |                                                           |                  |                   |
| LSTb             | 0.08 (0.06-0.11)                                      | 0.10 (0.07-0.13)               | 0.07 (0.05-0.11)               | 0.18 (0.13-0.18)                                          | 0.16 (0.14-0.19) | 0.11 (0.07-0.18)  |
| LSTc             | 0.80 <sup>x</sup> (0.64-0.97)                         | 0.27 <sup>xz</sup> (0.19-0.36) | 0.11 <sup>z</sup> (0.07-0.16)  | 0.65 (0.43-0.71)                                          | 0.12 (0.10-0.35) | 0.03 (0.02-0.04)  |
| DSLNT            | 0.58 <sup>x</sup> (0.39-0.73)                         | 0.30 <sup>xz</sup> (0.12-0.41) | 0.18 <sup>z</sup> (0.03-0.30)  | 0.69 (0.43-0.86)                                          | 0.12 (0.07-0.39) | 0.10 (0.02-0.27)  |
| DSLNH            | 0.22 <sup>xy</sup> (0.12-0.29)                        | 0.22 <sup>xz</sup> (0.15-0.32) | 0.09 <sup>z</sup> (0.05-0.13)  | 0.16 (0.10-0.22)                                          | 0.28 (0.16-0.47) | 0.09 (0.06-0.11)  |
|                  | <b>Fucosylated, sialylated HMOs</b>                   |                                |                                |                                                           |                  |                   |
| FDSLNH           | 0.06 <sup>y</sup> (0.03-0.11)                         | 0.16 <sup>z</sup> (0.08-0.28)  | 0.14 <sup>yz</sup> (0.09-0.23) | 0.12 (0.09-0.16)                                          | 0.54 (0.38-0.63) | 0.44 (0.21-0.77)  |
| <b>Total</b>     | 16.88 (15.98-17.54)                                   | 15.58 (15.06-16.55)            | 16.93 (15.44-17.50)            | 9.68 (9.61-10.48)                                         | 8.97 (8.51-9.25) | 9.29 (8.78-10.47) |

IQR: interquartile range. <sup>x</sup> indicates that the HMO concentration at visit 1 is significantly different ( $p < 0.05$ ) from the concentration at visit 2, <sup>y</sup> indicates that the HMO concentration at visit 1 is significantly different ( $p < 0.05$ ) from the concentration at visit 3 and <sup>z</sup> indicates that the HMO concentration at visit 2 is significantly different ( $p < 0.05$ ) from the concentration at visit 3 according to Friedman post-hoc test. . DFLac, difucosyllactose; DFLNH, difucosyllacto-N-hexaose; DFLNT, difucosyllacto-N-tetraose; DSLNH, disialyllacto-N-hexaose; DSLNT, disialyllacto-N-tetraose; FDSLNH, fucodisialyllacto-N-hexaose; FLNH, fucosyllacto-N-hexaose; HMO, human milk

## Online Supplementary Material

oligosaccharide; LNFP, lacto-N-fucopentaose; LNH, lacto-N-hexaose; LNnT, lacto-N-neotetraose; LNT, lacto-N-tetraose; LSTb, sialyl-lacto-N-tetraose b; LSTc, sialyl-lacto-N-tetraose c; 2'FL, 2'-fucosyllactose; 3FL, 3-fucosyllactose; 3'SL, 3'-sialyllactose; 6'SL, 6'-sialyllactose.
